# Supplementary material for: BAY-3827 and SBI-0206965: Potent AMPK Inhibitors That Paradoxically Increase Thr172 Phosphorylation
Source: MDPI journal article supplement (doi:10.3390/ijms25010453), 2023-12-29

Figure S3

A) Inhibition of rat liver AMPK complexes

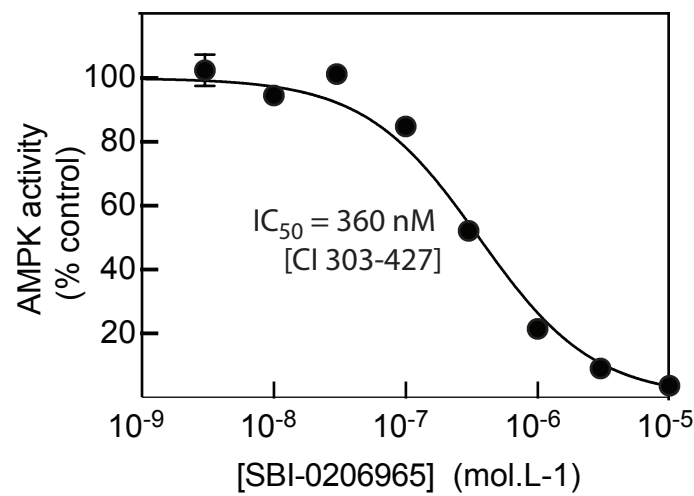

B) Inhibition of human AMPK complexes

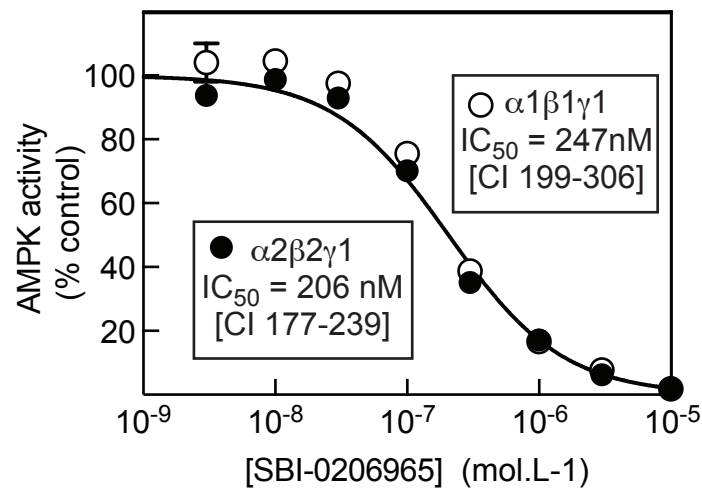

C) Inhibition of human  $\alpha 2$  kinase domain

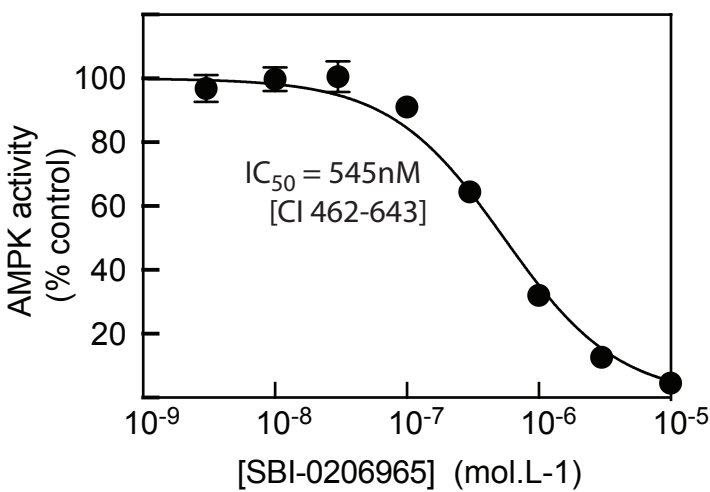

Supplement: s1 [file s1]
