# Supplementary material for: BAY-3827 and SBI-0206965: Potent AMPK Inhibitors That Paradoxically Increase Thr172 Phosphorylation
Source: MDPI journal article supplement (doi:10.3390/ijms25010453), 2023-12-29

Figure S1

A) Heat maps summarizing relative selectivity of AMPK inhibitors

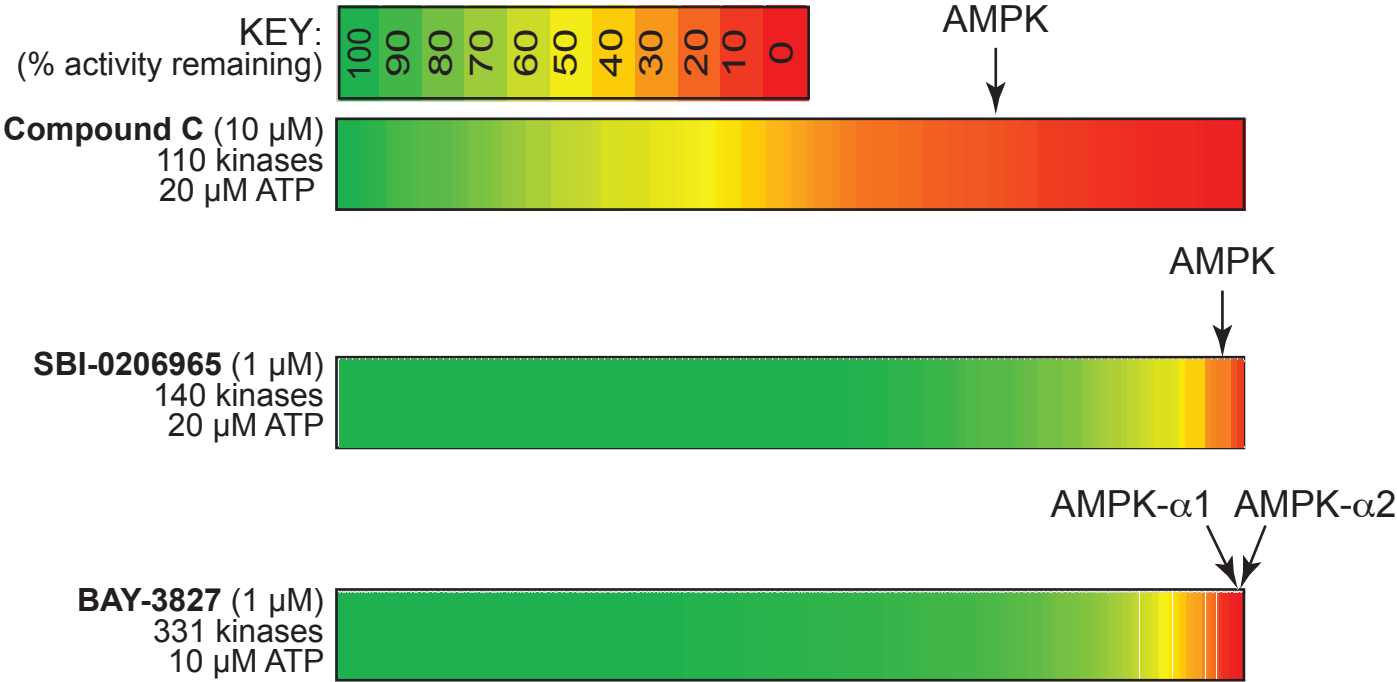

B) inhibition of protein kinases by SBI-0206965 (top tenth percentile only)

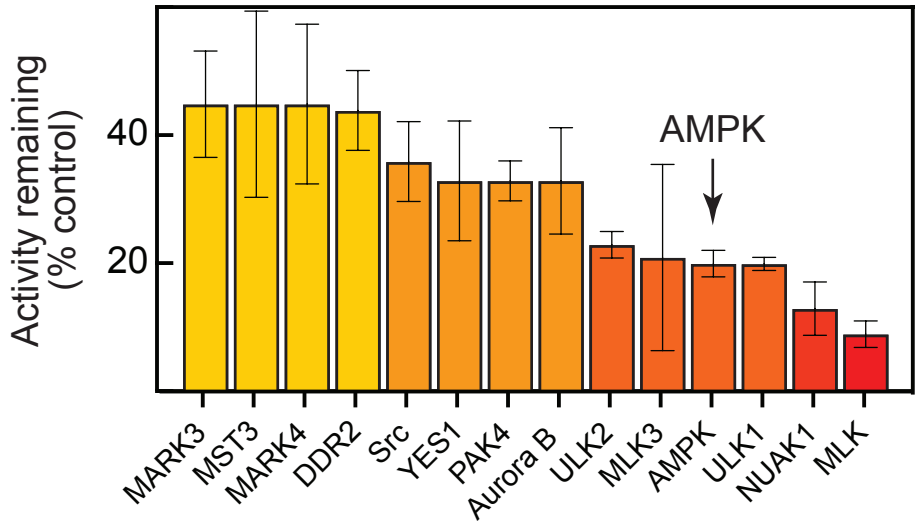

C) inhibition of protein kinases by BAY-3827 (top tenth percentile only)

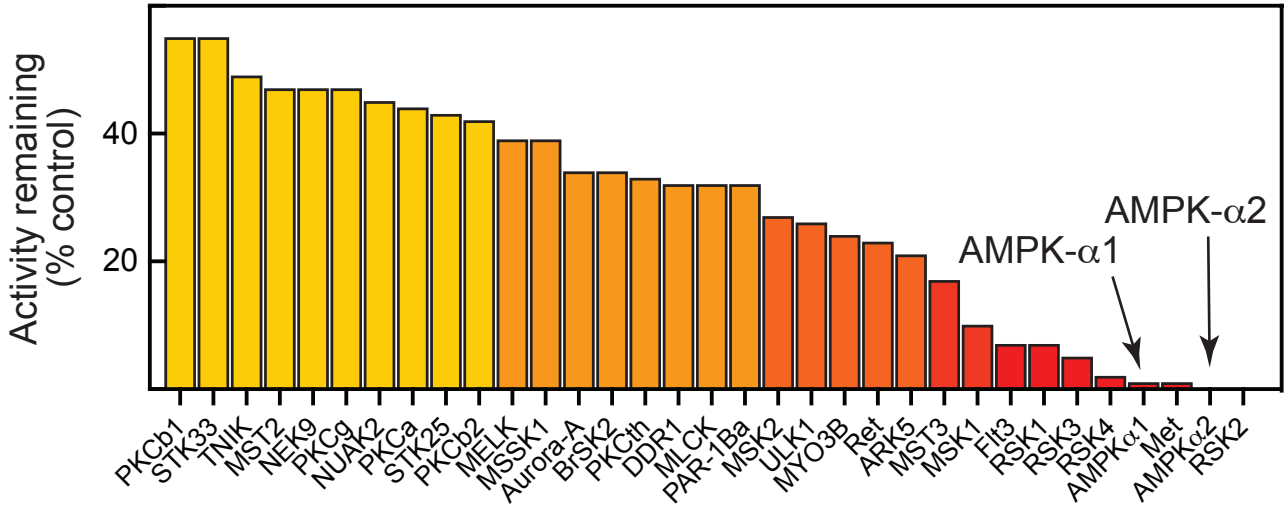

Supplement: s1 [file s1]
