# Supplementary material for: BAY-3827 and SBI-0206965: Potent AMPK Inhibitors That Paradoxically Increase Thr172 Phosphorylation
Source: Int J Mol Sci. 2023 Dec 29;25(1):453. doi: 10.3390/ijms25010453 (PMC10778976; doi:10.3390/ijms25010453)
Supplement: Supplementary file 1 [file ijms-25-00453-s001.zip]

Archive with 5 entries (5 files):
- FigS1.pdf
- FigS2.pdf
- FigS3.pdf
- FigS4.pdf
- Supplementary Figure Legends.pdf
