# Supplementary figures and images for: BAY-3827 and SBI-0206965: Potent AMPK Inhibitors That Paradoxically Increase Thr172 Phosphorylation
Source: MDPI journal article supplement (doi:10.3390/ijms25010453), 2023-12-29

Figure S4

A) Effect of BAY-3827 on PPM1A activity

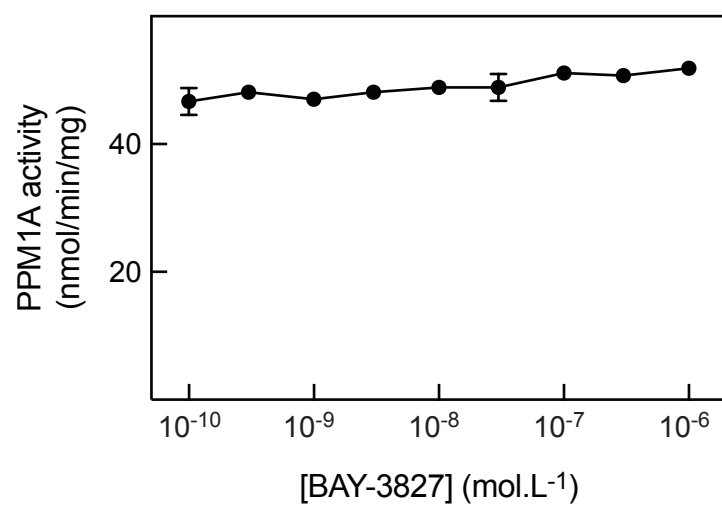

B) Effect of SBI-0206965 on PPM1A activity

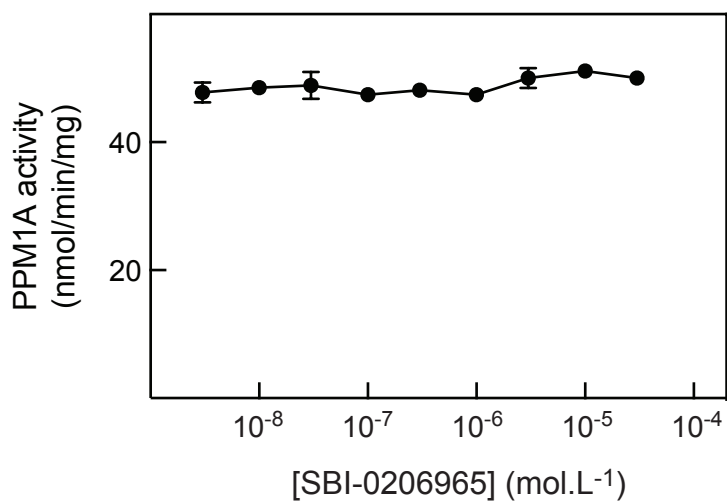

Supplement: s1 [file s1]

Figure S2

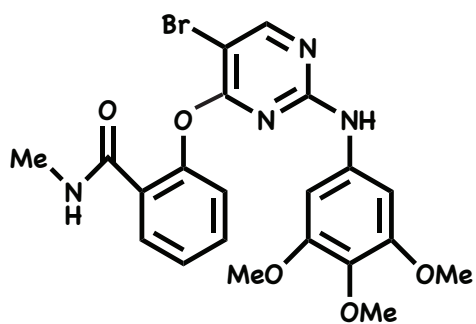

**SBI-0206965**

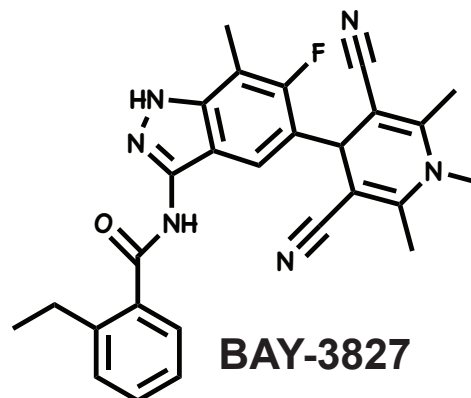

**BAY-3827**

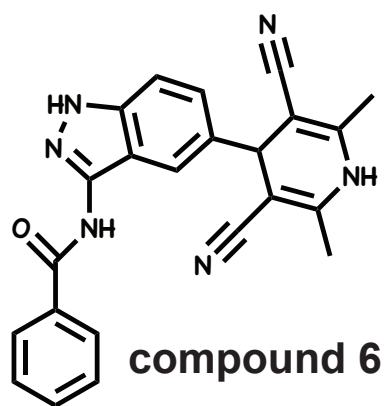

**compound 6**

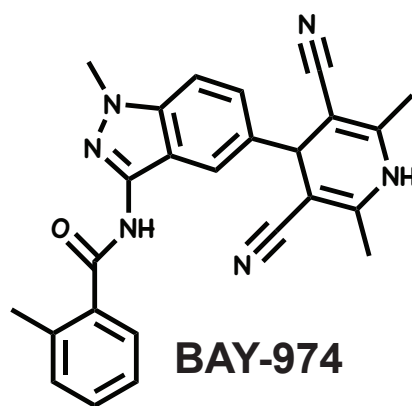

**BAY-974**

Supplement: s1 [file s1]
